# Supplementary material for: A DNA-Damage Inducible Gene Promotes the Formation of Antibiotic Persisters in Response to the Quorum Sensing Signaling Peptide in Streptococcus mutans
Source: MDPI journal article supplement (doi:10.3390/genes13081434), 2022-08-12
Supplement: s1 [file s1]

**Table S1.** Oligonucleotides used in this study.

|                                       | Forward primer                                 | Reverse primer                                 |
|---------------------------------------|------------------------------------------------|------------------------------------------------|
| <b>Insertion-deletion mutagenesis</b> |                                                |                                                |
| Erythromycin resistance cassette      | 5'- <b>GGCGCG</b> CCCCGGGCCCAAAATTTGTTTGAT-3'  | 5'- <b>GGCCGGCC</b> AGTCGGCAGCGACTCATAGAAT-3'  |
| Spectinomycin resistance cassette     | 5'- <b>GGCGCGCC</b> ACTAATAACGTAACGTGACTGGC-3' | 5'- <b>GGCCGGCCA</b> AGTAGTTTCCGATATGGACGAG-3' |
| Gene SMU.299 (upstream)               | 5'-ATCTGAATGGAGCTAGAATG-3'                     | 5'- <b>GGCGCG</b> CCCCCAGTTACATGTGAAAGTG-3'    |
| Gene SMU.299 (downstream)             | 5'- <b>GGCCGGCC</b> GTAGTAAATAGCTGGGCTTC-3'    | 5'-AGGAAACCATGGAATCTGCT-3'                     |
| <b>Ectopic expression in pIB166</b>   |                                                |                                                |
| Pep299+                               | 5'- <b>CCGCGG</b> GCAGATGTCATTAAGCGTAC-3'      | 5'- <b>GAATTC</b> GATGAGGTGTTTGCCGTTTA-3'      |
| Tox+                                  | 5'- <b>CCGCGG</b> AATAAAAAATGATTAATTGAGAAC-3'  | 5'- <b>GAATTC</b> CTATTAACATCATTTTACTAAAG-3'   |
| <b>qRT-PCR</b>                        |                                                |                                                |
| SMU.299                               | 5'-ACGATGGAGCTAATGGCTAT-3'                     | 5'-AAGCGTAAGCGGCAAAACTT-3'                     |
| SMU.40                                | 5'-GACAATACAAGACAGCAAAGC-3'                    | 5'-GCTACAATAATCAGCCCCTC-3'                     |
| SMU.150                               | 5'-GATGTAATGGACAGCCAAACAC-3'                   | 5'-TAACAAGAGTCGCACCTGCCAG-3'                   |
| SMU.151                               | 5'-GGAGTAAACAAGCTGCTGATACG-3'                  | 5'-TACAGATCCAACCGCACCAACTCC-3'                 |
| SMU.167                               | 5'-ACGATGAACGTCAGCAGCAA-3'                     | 5'-TTTTCCAAAACGTGGGTCAAC-3'                    |
| SMU.173                               | 5'-GATCCCAAACAAGGACATGAAC-3'                   | 5'-GGATAATCACGCTTGGTATTGC-3'                   |
| SMU.219                               | 5'-AGGCAGACACTTAGTCACCT-3'                     | 5'-GGCAAAAGTGTTGCTTTGGC-3'                     |
| SMU.423                               | 5'-TTGAGGGTGTTGGTATGATTAG-3'                   | 5'-CCAACGACTGGGAGAGTAACTG-3'                   |
| SMU.895                               | 5'-GGTGGAGAGGCATTAGAGAACT-3'                   | 5'-TCTTCTAAAATAATCCCATTGG-3'                   |
| SMU.1902                              | 5'-CCTAGCCACTCTCTTGGATCA-3'                    | 5'-CATGTAAAGTCATTGACAGAA-3'                    |
| SMU.1905                              | 5'-AAAACCTCCCGCTGCAATTGTA-3'                   | 5'-AAATATTAAATACTGATGCATTGG-3'                 |
| SMU.1914                              | 5'-AAGAGCTCCTCCGATTCC-3'                       | 5'-TAGGTGCTGGGCAAGGTTA-3'                      |
| <i>gyrA</i> (HKP)                     | 5'-ATTGTTGCTCGGGCTCTTCCAG-3'                   | 5'-ATGCGGCTTGTCAGGAGTAACC-3'                   |

Restriction sites are in bold.
